# Supplementary material for: Age affects the paracrine activity and differentiation potential of human adipose-derived stem cells
Source: PubMed Central journal article supplement — Mol Med Rep. 2020 Dec 22;23(2):160. doi: 10.3892/mmr.2020.11799 (PMC7789087; doi:10.3892/mmr.2020.11799), 2020-12-22
Supplement: Supplementary_Data.pdf [file Supplementary_Data.pdf]

Figure S1. Cytokine analysis of conditioned medium of ADSC from the young and old. The supernatant of cultured ADSC was collected and subjected to cytokine array. The level of cytokine in conditioned medium was expressed as a pixel (intensity) using ImageJ. ADSCs, adipose-derived stem cells.

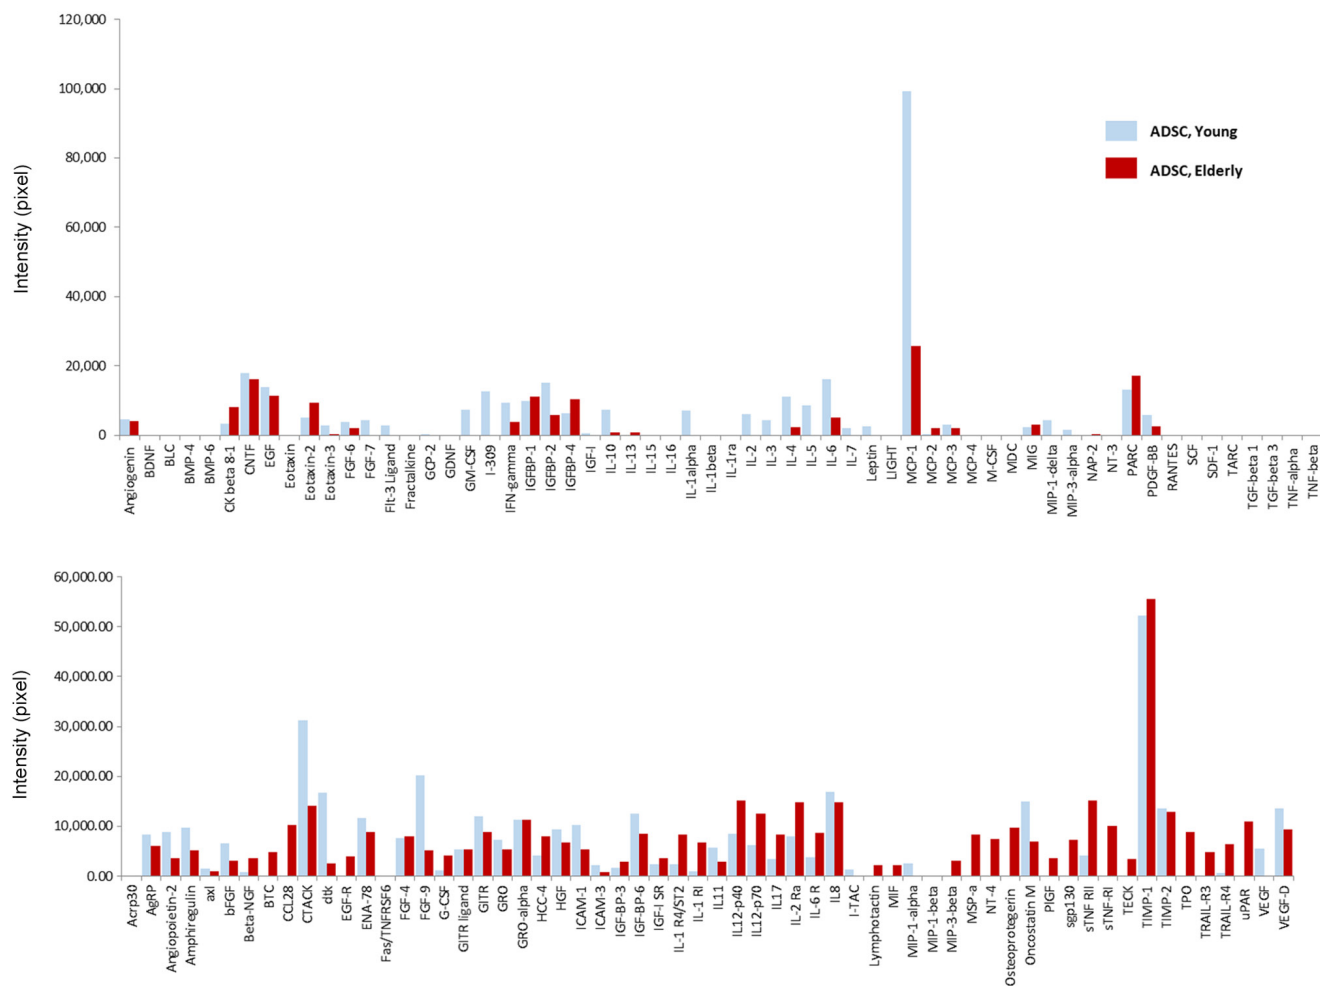

Table SI. Characterization of human ADSCs.

| Cell surface marker | Percentage of expression (%) |           |
|---------------------|------------------------------|-----------|
|                     | Young                        | Elderly   |
| CD45                | 0.02±0.01                    | 0.03±0.02 |
| CD29                | 87.5±1.23                    | 89.4±3.51 |
| CD105               | 80.8±0.90                    | 89.4±0.02 |
| CD34                | 1.44±0.03                    | 2.35±0.98 |
| CD90                | 98.4±3.2                     | 97.5±3.42 |

ADSCs were analyzed by flow cytometry. Fixed cells were treated with FITC-conjugated antibodies against CD45, CD29, CD105, CD34 and CD90 for 20 min at 4°C in the dark. After washing with buffer twice, cells were re-suspended with buffer and analyzed with FACSCalibur using Cell Quest software (version 3.0; BD Biosciences). ADSCs, adipose derived stem cells.
